# Supplementary material for: Preclinical Evaluation of Recombinant Microbial Glycoside Hydrolases in the Prevention of Experimental Invasive Aspergillosis
Source: PubMed Central journal article supplement (PMC8546845; doi:10.1128/mbio.02446-21), 2021-09-28
Supplement: mbio.02446-21-sf001.pdf [file mbio.02446-21-sf001.pdf]

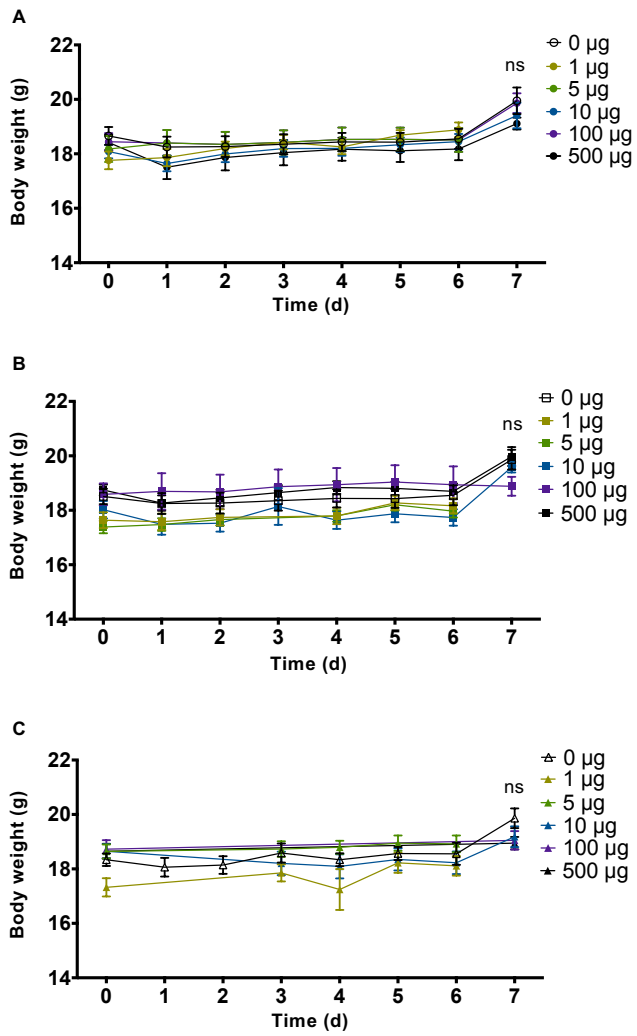

**FIG S1. Intratracheal GH therapy is well tolerated by mice.** Body weight of immunocompetent BALB/c mice following intratracheal treatment with the indicated single doses of (A) Sph3<sub>h</sub>, (B) PeIA<sub>h</sub>, or (C) Ega3<sub>h</sub>-Pp. Each point represents the body weight of ≥ 5 mice per group. ns indicates no significant difference in the change in body weight of mice treated with 500 µg GH relative to buffer-treated mice on the same day as determined by two-way ANOVA with Dunnett's multiple comparisons test.
