# Supplementary material for: Preclinical Evaluation of Recombinant Microbial Glycoside Hydrolases in the Prevention of Experimental Invasive Aspergillosis
Source: PubMed Central journal article supplement (PMC8546845; doi:10.1128/mbio.02446-21), 2021-09-28
Supplement: mbio.02446-21-sf002.pdf [file mbio.02446-21-sf002.pdf]

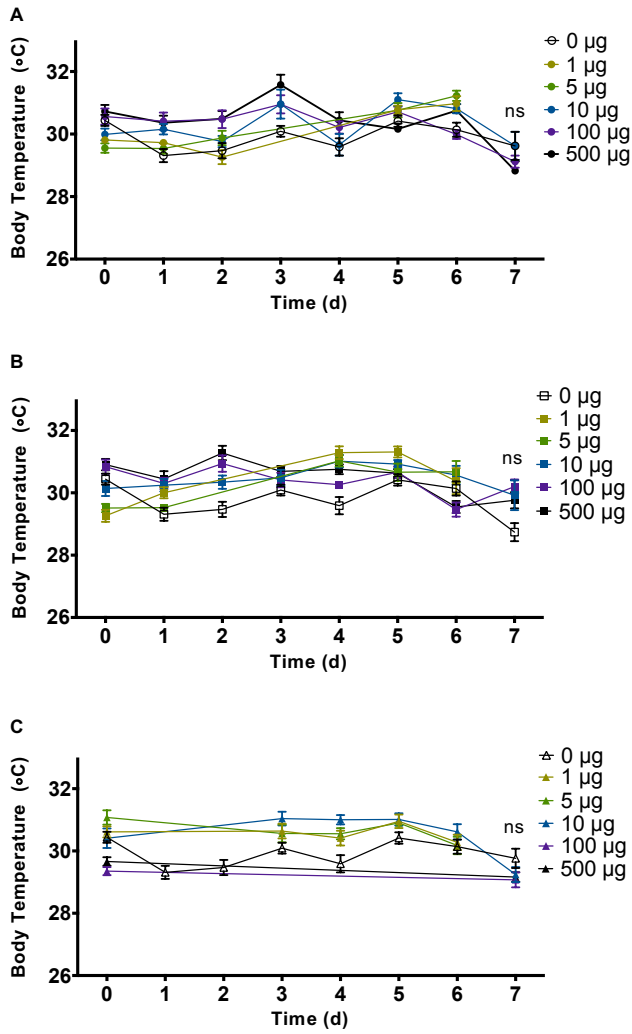

**FIG S2. Intratracheal GH therapy is well tolerated by mice.** Body temperature of immunocompetent BALB/c mice following intratracheal treatment with the indicated single doses of (A) Sph3<sub>h</sub>, (B) PelA<sub>h</sub>, or (C) Ega3<sub>h</sub>-Pp. Points represent the body temperature of  $\geq 5$  mice per group. ns indicates no significant difference in the change in body temperature of mice treated with 500  $\mu\text{g}$  GH relative to buffer-treated mice as determined by two-way ANOVA with Dunnett's multiple comparisons test.
