# Supplementary material for: Preclinical Evaluation of Recombinant Microbial Glycoside Hydrolases in the Prevention of Experimental Invasive Aspergillosis
Source: PubMed Central journal article supplement (PMC8546845; doi:10.1128/mbio.02446-21), 2021-09-28
Supplement: mbio.02446-21-sf003.pdf [file mbio.02446-21-sf003.pdf]

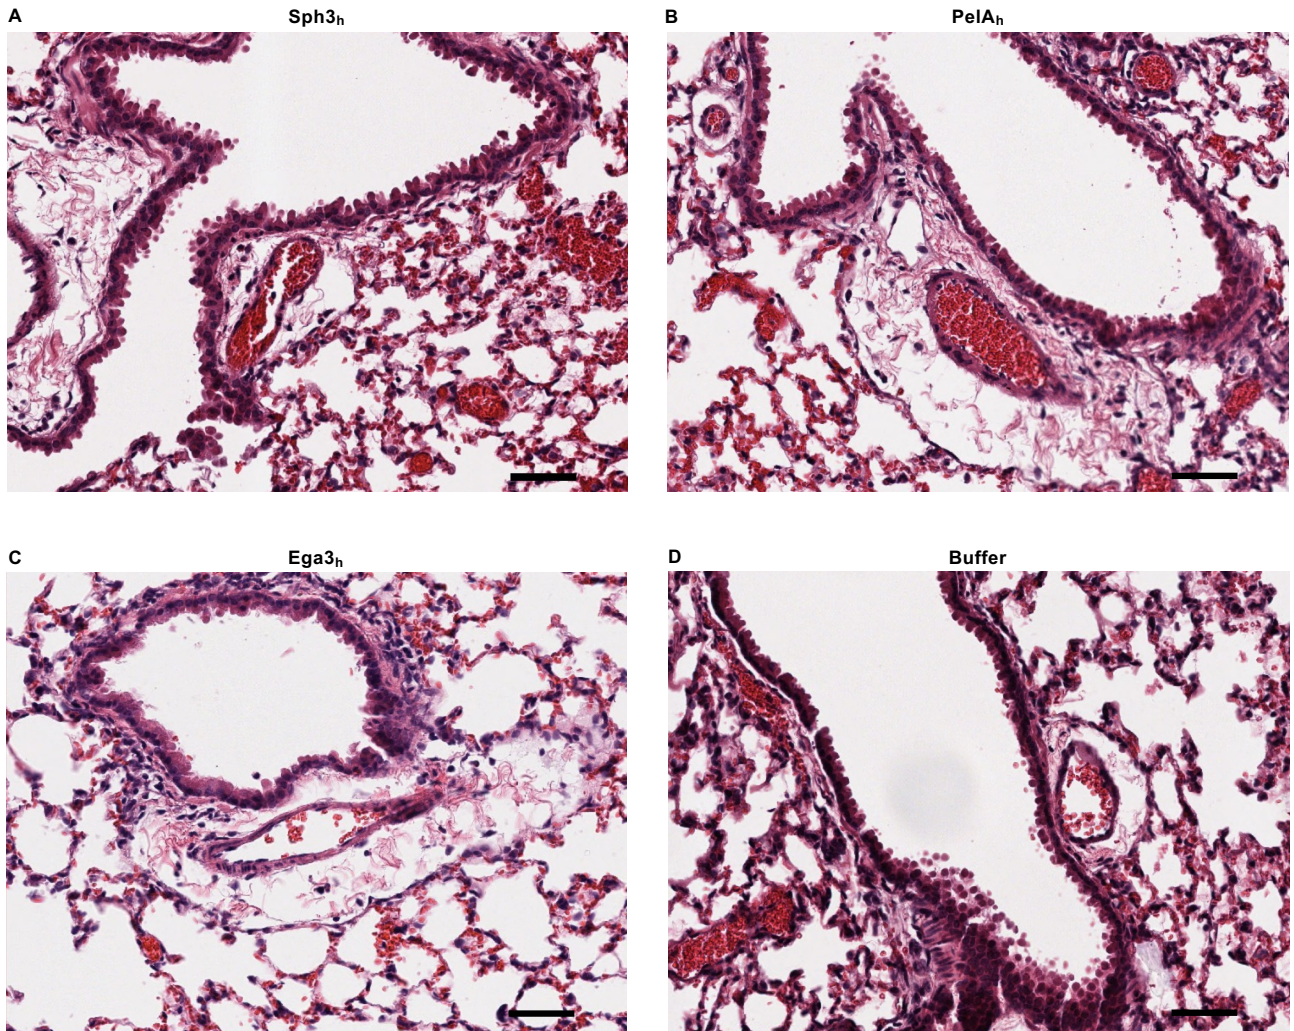

**FIG S3. Intratracheal GH therapy is well tolerated by mice.** Haematoxylin and eosin stained sections of lungs obtained from immunocompetent BALB/c mice 7 d after intratracheal treatment with a single dose of 500  $\mu\text{g}$  of (A) Sph3<sub>h</sub>, (B) PeIA<sub>h</sub>, (C) Ega3<sub>h</sub>-*Pp* or (D) PBS. Representative images from 3 mice imaged at 40X (scale bar = 50  $\mu\text{m}$ ).
